# Supplementary material for: A robust and ion-conductive protein-based binder enabling strong polysulfide anchoring for high-energy lithium–sulfur batteries
Source: Royal Society of Chemistry journal article supplement (doi:10.1039/c8ta11384j), 2018-12-21
Supplement: c8ta11384j1.pdf [file c8ta11384j1.pdf]

## **Supporting Information**

### **A Robust and Ion-Conductive Protein-Based Binder Enabling Strong Polysulfide Anchoring for High-Energy Lithium-Sulfur Batteries**

Xuwei Fu<sup>1</sup>, Louis Scudiero<sup>2</sup> and Wei-Hong Zhong<sup>1\*</sup>

1. School of Mechanical and Materials Engineering, Washington State University, Pullman, WA 99164, USA.
2. Department of Chemistry, Washington State University, Pullman, WA 99164, USA.

**Table S1.** Amino acid profile of soy protein

| <b>Amino acid</b>    | <b>Percentage<br/>(wt%)</b> | <b>Amino acid</b> | <b>Percentage<br/>(wt%)</b> |
|----------------------|-----------------------------|-------------------|-----------------------------|
| <b>Glutamic acid</b> | 19.1                        | <b>Valine</b>     | 5.0                         |
| <b>Aspartic acid</b> | 11.6                        | <b>Isoleucine</b> | 4.9                         |
| <b>Leucine</b>       | 8.2                         | <b>Alanine</b>    | 4.3                         |
| <b>Arginine</b>      | 7.6                         | <b>Glycine</b>    | 4.2                         |
| <b>Threonine</b>     | 6.7                         | <b>Tyrosine</b>   | 3.8                         |
| <b>Lysine</b>        | 6.3                         | <b>Histidine</b>  | 2.6                         |
| <b>Phenylalanine</b> | 5.2                         | <b>Tryptophan</b> | 1.4                         |
| <b>Serine</b>        | 5.2                         | <b>Methionine</b> | 1.3                         |
| <b>Proline</b>       | 5.1                         | <b>Cystine</b>    | 1.3                         |

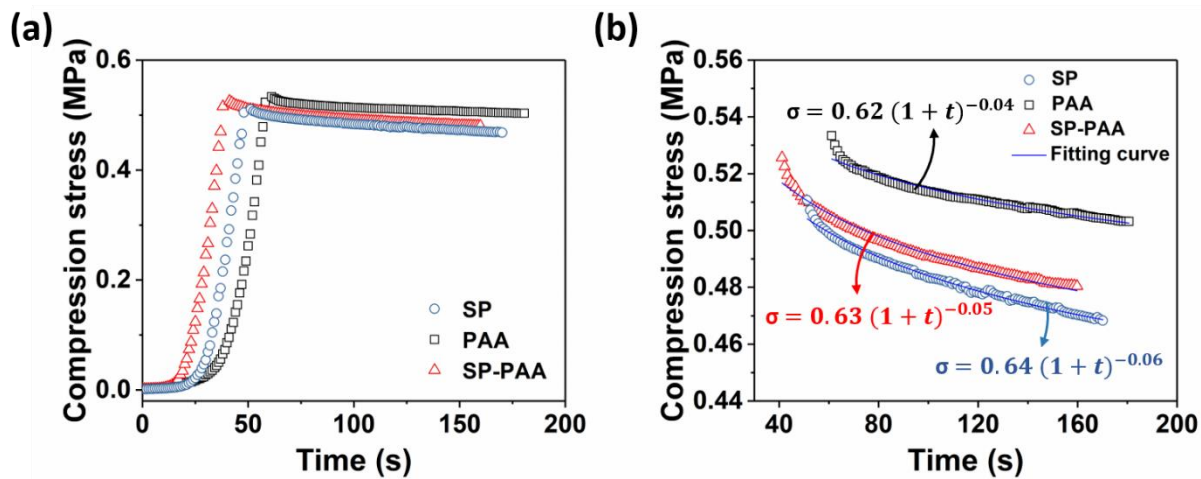

**Figure S1. Mechanical properties of dry S cathodes.** (a) – (b) The evolution of compression stress versus indentation time for as-prepared S cathodes with different binders, measured by compression and stress-relaxation.

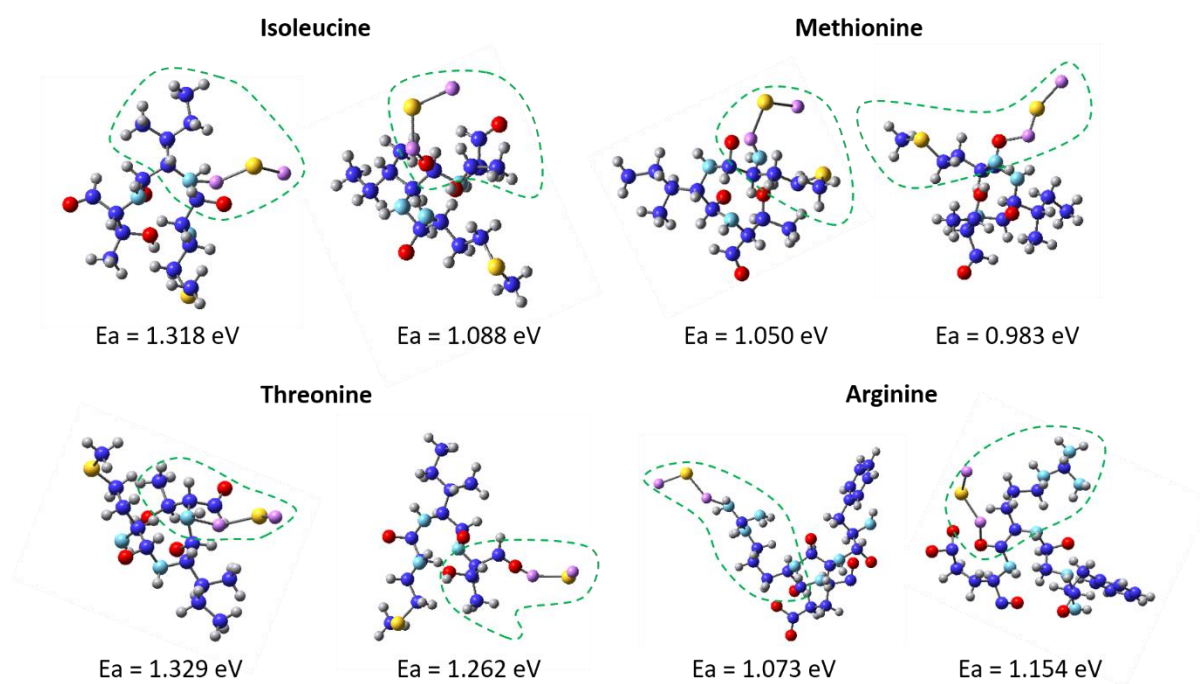

**Figure S3.** Adsorption geometry of  $\text{Li}_2\text{S}$  by various amino acids (Isoleucine, Methionine, Threonine and Arginine) via amine and carboxyl groups.

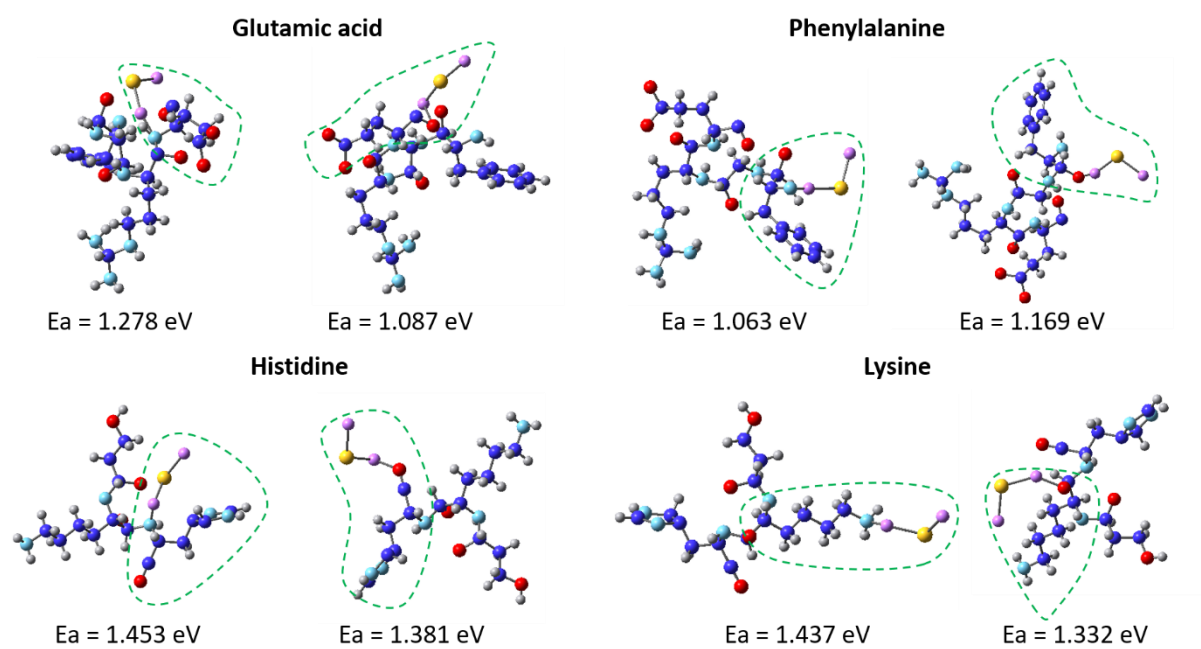

**Figure S4.** Adsorption geometry of  $\text{Li}_2\text{S}$  by various amino acids (Glutamic acid, Phenylalanine, Histidine and Lysine) via amine and carboxyl groups.

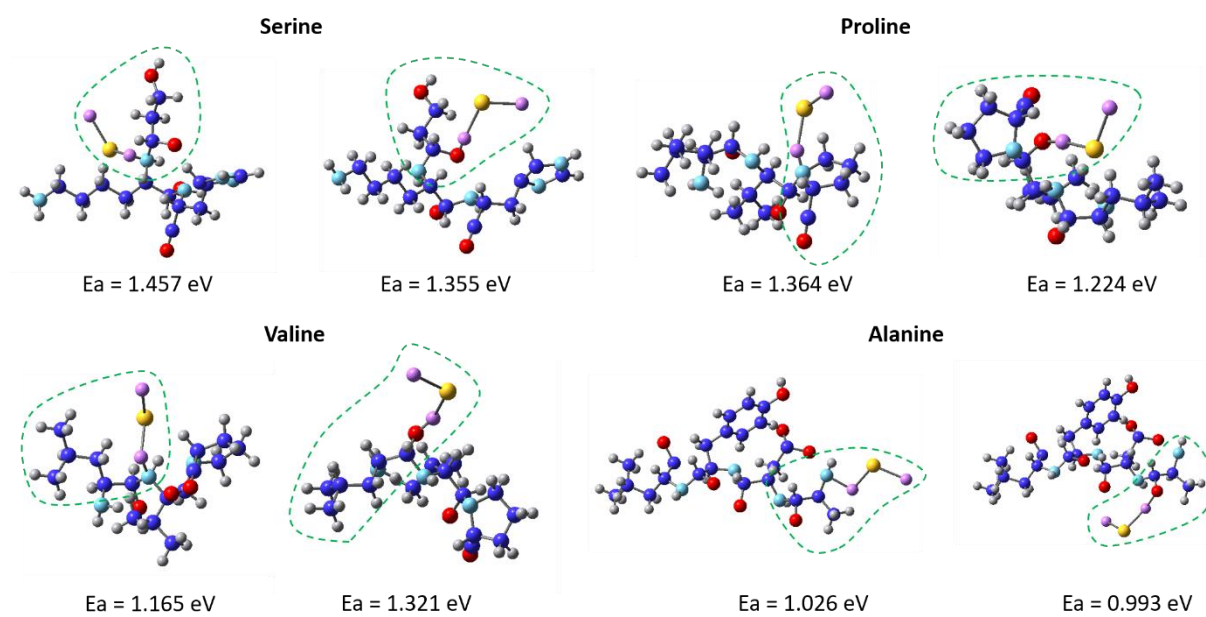

**Figure S5.** Adsorption geometry of  $\text{Li}_2\text{S}$  by various amino acids (Serine, Proline, Valine and Alanine) via amine and carboxyl groups.

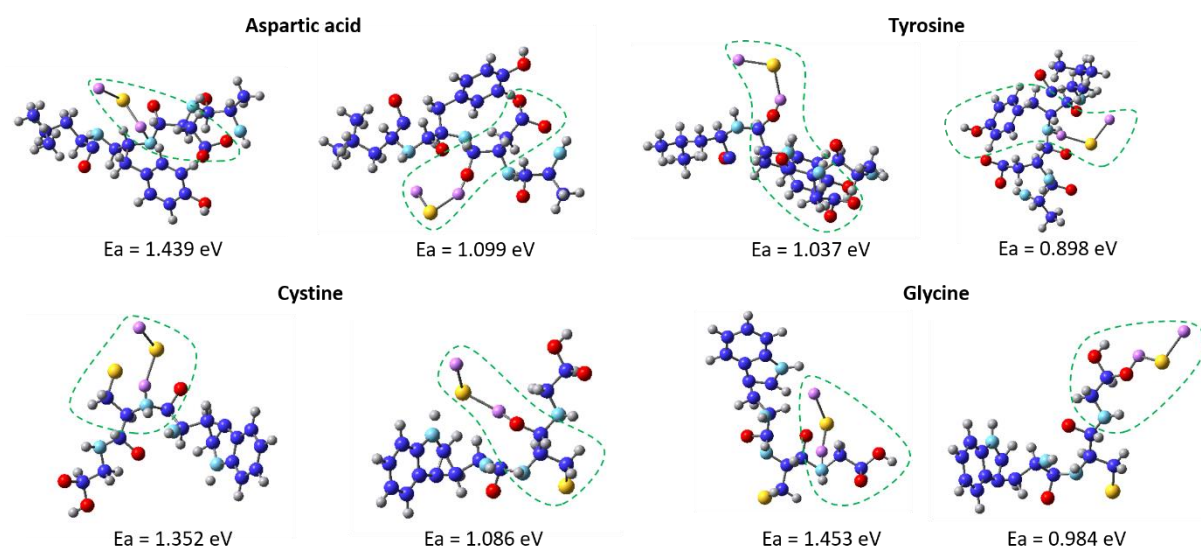

**Figure S6.** Adsorption geometry of  $\text{Li}_2\text{S}$  by various amino acids (Aspartic acid, Tyrosine, Cystine and Glycine) via amine and carboxyl groups.

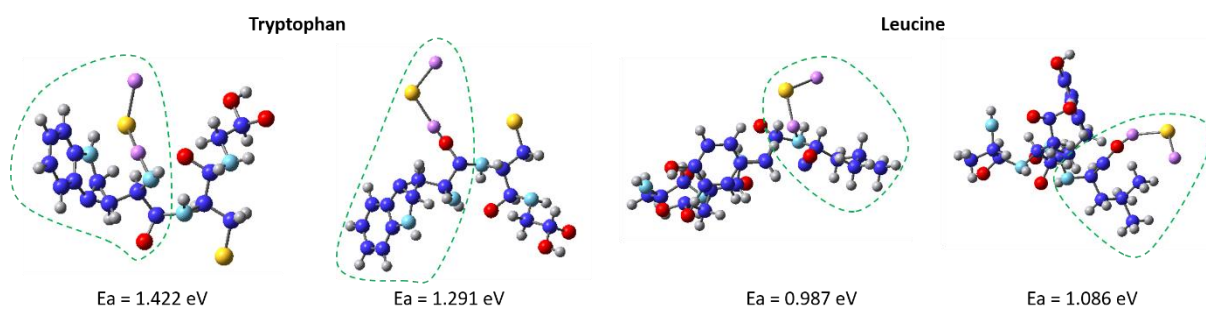

**Figure S7.** Adsorption geometry of  $\text{Li}_2\text{S}$  by various amino acids (Tryptophan and Leucine) via amine and carboxyl groups.

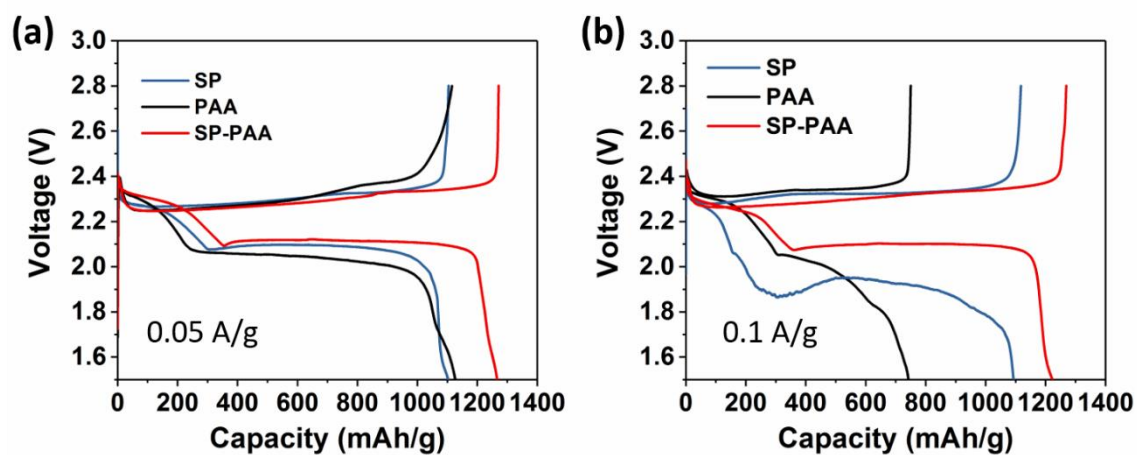

**Figure S8. Voltage profiles of S cathodes with 2.8 mg/cm<sup>2</sup> S loading.** (a) – (b) Charging/discharging curves of S cathodes with different binders at 0.05 and 0.1 A/g, respectively.
